# Supplementary material
Source: PubMed Central journal article supplement (PMC3371244)
Supplement: supp_M025742_jlr.M025742-1.pdf [file supp_M025742_jlr.M025742-1.pdf]

## Supporting Information

### Stereospecificity of Fatty Acid 2-Hydroxylase and Differential Functions of 2-Hydroxy Fatty Acid Enantiomers

Lin Guo, Xu Zhang, Dequan Zhou, Adewole L. Okunade, and Xiong Su

Department of Internal Medicine, Center for Human Nutrition and Department of Cell Biology and Physiology, Washington University School of Medicine, St. Louis, MO, 63110

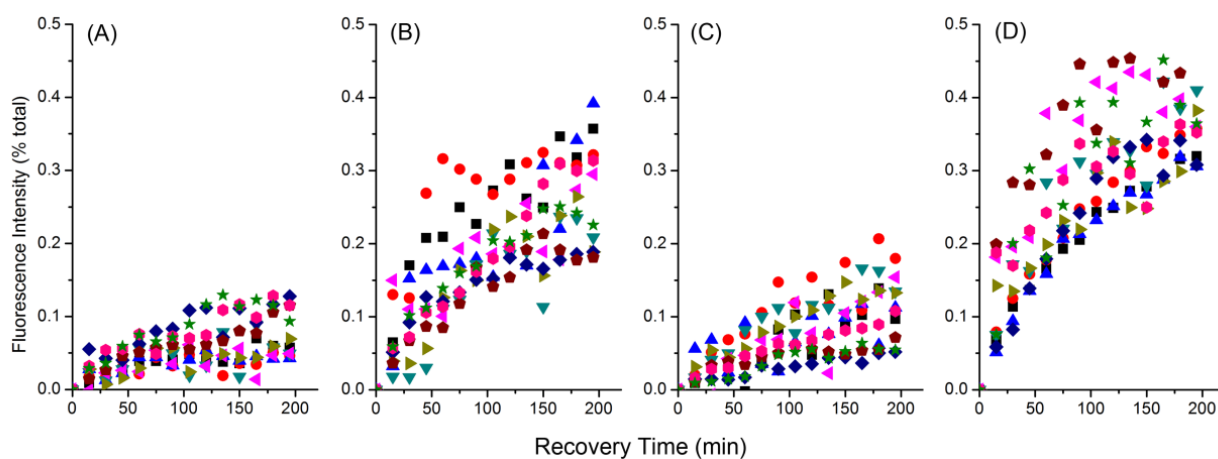

**Figure S1:** Stereospecific reverse effect on accelerated raft fluidity induced by FA2H depletion. 3T3-L1 adipocytes were treated with a negative control siRNA (A) or an siRNA recognizing FA2H (B-D). 24 h post transfection, 50  $\mu$ M (*R*)-2-OH palmitic acid (C) or (*S*)-2-OH palmitic acid (D) were added. Kinetics of recovery for Alexa 488-CTxB of each experiment was shown.

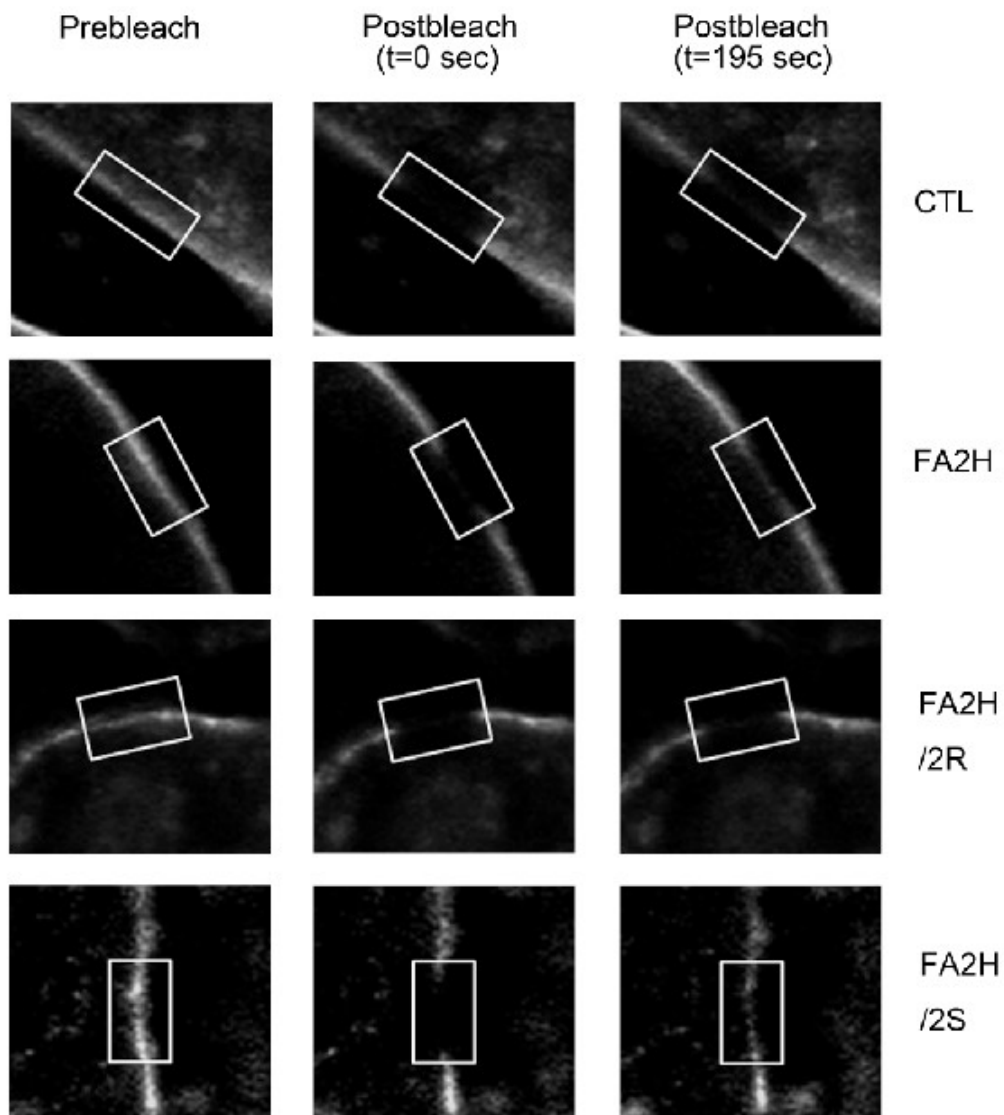

**Figure S2:** Amplified images of figure 3A.

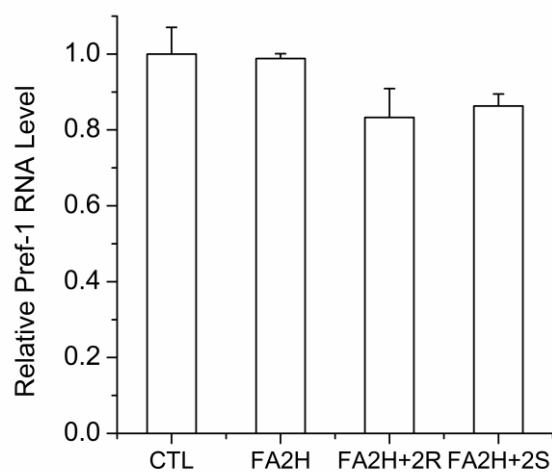

**Figure S3:** Pref-1 mRNA levels in FA2H knockdown adipocytes and in adipocytes treated with 2-OH PA enantiomers. 3T3-L1 adipocytes were treated with a negative control siRNA (CTL) or an siRNA recognizing FA2H (FA2H). 24 h post tranfection, 50  $\mu$ M (R)-2-OH PA (2R) or (S)-2-OH PA (2S) were added as indicated. mRNA samples were prepared and the Pref-1 level was analyzed by RT-PCR. The data represent the means  $\pm$  S.E. of three independent experiments.

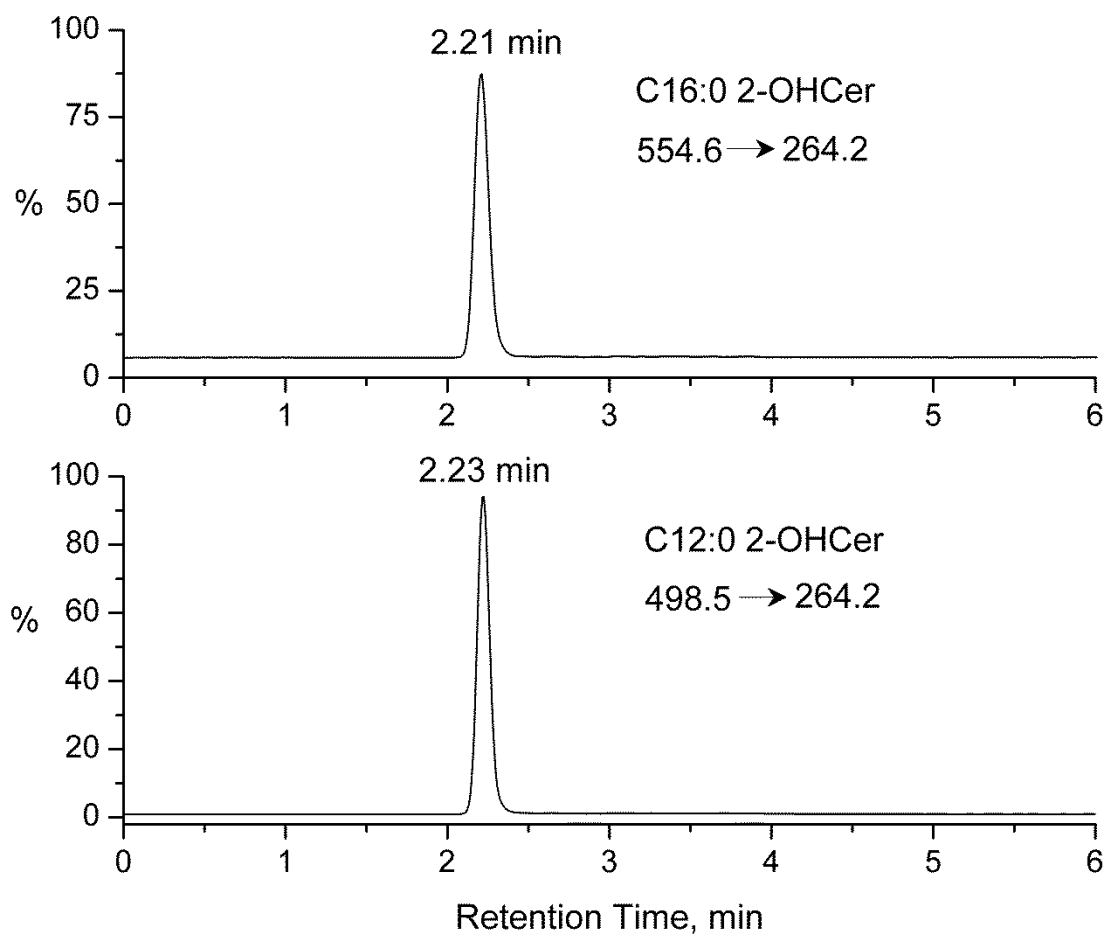

**Figure S4:** MRM chromatograms obtained from the analysis of C16:0 2-OHCer in adipocyte extracts (top) and authentic standard C12:0 2-OHCer (bottom) spiked in the lipid extracts.

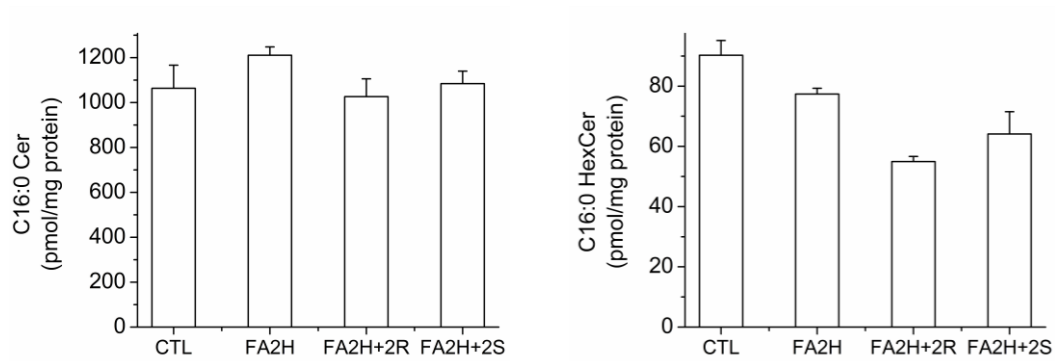

**Figure S5:** Regulation of C16:0 Cer and HexCer by FA2H and 2-OH PA enantiomers. 3T3-L1 adipocytes were treated with a negative control siRNA (CTL) or an siRNA recognizing FA2H (FA2H). 24 h post tranfection, 50  $\mu$ M (*R*)-2-OH PA (2R) or (*S*)-2-OH PA (2S) were added as indicated. C16:0 Cer and C16:0 HexCer were quantified by LC ESI-MS/MS and results are the means  $\pm$  S.E. of three independent experiments.

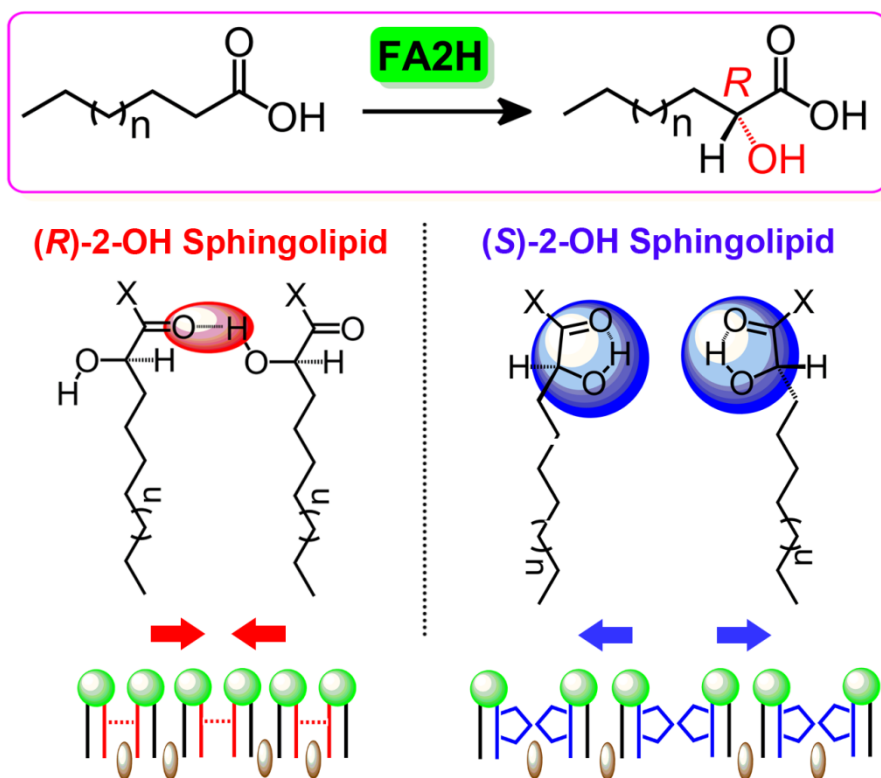

**Figure S6.** A proposed model for differential interaction of spingolipids containing (*R*)-2-OH FA or (*S*)-2-OH FA. The (*R*)-2-hydroxyl group is preferred to participate in intermolecular hydrogen bonding, favoring lipid-lipid interaction whereas the 2-hydroxyl group of (*S*)-form is usually involved in an intramolecular hydrogen bonding with adjacent carbonyl oxygen. Accordingly, raft domains enriched in (*R*)-2-OH spingolipids are more tightly packed and become less mobile, as compared to those containing more (*S*)-2-OH spingolipids, where the steric hindrance caused by the branched loop of intramolecular hydrogen bond attenuates the lipid-lipid interaction and thus promotes membrane fluidity.
